# Supplementary material
Source: MDPI journal article supplement (https://www.mdpi.com/2076-3417/11/20/9503)

**Table S1.** Linkage disequilibrium among PON1 polymorphisms

|                                                                                                                       | <i>PON1</i> 192 |          | <i>PON1</i> 55 |          |
|-----------------------------------------------------------------------------------------------------------------------|-----------------|----------|----------------|----------|
|                                                                                                                       | D%              | <i>p</i> | D%             | <i>p</i> |
| <i>PON1</i> -108                                                                                                      | 22.55           | 0.06     | 56.36          | <0.001   |
| <i>PON1</i> 192                                                                                                       |                 |          | 71.73          | <0.001   |
| Values presented as percentage. Chi-squared test and Fisher's exact tests were used to obtain D% and <i>p</i> values. |                 |          |                |          |

**Table S2.** Allele and genotype frequencies of *PON1*

|                                                                                                                                                                                                                                     |    | Polymorphic site |                 |                   |               |                 |          |                   |                 |          |      |                   |
|-------------------------------------------------------------------------------------------------------------------------------------------------------------------------------------------------------------------------------------|----|------------------|-----------------|-------------------|---------------|-----------------|----------|-------------------|-----------------|----------|------|-------------------|
|                                                                                                                                                                                                                                     |    | <i>C-108T</i>    |                 |                   | <i>L55M</i>   |                 |          | <i>Q192R</i>      |                 |          |      |                   |
|                                                                                                                                                                                                                                     |    | Men<br>n = 19    | Women<br>n = 26 | <i>p</i>          | Men<br>n = 18 | Women<br>n = 24 | <i>p</i> | Men<br>n = 19     | Women<br>n = 26 | <i>p</i> |      |                   |
| Allele                                                                                                                                                                                                                              | C  | 0.53             | 0.67            |                   | L             | 0.69            | 0.71     |                   | Q               | 0.50     | 0.42 |                   |
|                                                                                                                                                                                                                                     | T  | 0.47             | 0.33            |                   | M             | 0.31            | 0.29     |                   | R               | 0.50     | 0.58 |                   |
| Genotype                                                                                                                                                                                                                            | CC | 0.26             | 0.46            |                   | LL            | 0.44            | 0.54     |                   | Q               | 0.26     | 0.27 |                   |
|                                                                                                                                                                                                                                     |    |                  |                 |                   |               |                 |          |                   | Q               |          |      |                   |
|                                                                                                                                                                                                                                     | CT | 0.53             | 0.42            | 0.39 <sup>a</sup> | LM            | 0.50            | 0.33     | 0.59 <sup>a</sup> | Q               | 0.48     | 0.31 | 0.45 <sup>b</sup> |
|                                                                                                                                                                                                                                     |    |                  |                 |                   |               |                 |          |                   | R               |          |      |                   |
|                                                                                                                                                                                                                                     | TT | 0.21             | 0.12            |                   | MM            | 0.06            | 0.13     |                   | R               | 0.26     | 0.42 |                   |
|                                                                                                                                                                                                                                     |    |                  |                 |                   |               |                 |          |                   | R               |          |      |                   |
| Note: C/T denote nucleotide exchange for -108 polymorphic site; L/M and Q/R denote the amino acid exchange for 55 and 192 polymorphic sites.<br>Analyses made using <sup>a</sup> Fisher's exact and <sup>b</sup> Chi-squared tests. |    |                  |                 |                   |               |                 |          |                   |                 |          |      |                   |

**Table S3:** UPLC-MS. Data of the compounds detected from Malbec wine Retention times and MS fragmentation data in positive ion mode for wine Cabernet Sauvignon Malbec.

| Peak number | Tentatively Identified Compound                                                    | RT min | Tentatively identified compound | Experimental m/z | Theoretical m/z | Ion type           | Molecular formula                              | Metabolite class                | Reference |
|-------------|------------------------------------------------------------------------------------|--------|---------------------------------|------------------|-----------------|--------------------|------------------------------------------------|---------------------------------|-----------|
| 1           | 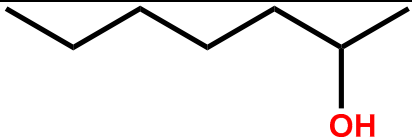  | 0.634  | (±)-2-Heptanol, heptan-2-ol     | 116.09           | 116.2013        | [M+H] <sup>+</sup> | C <sub>7</sub> H <sub>16</sub> O               | Fatty alcohols                  | [81]      |
| 2           | 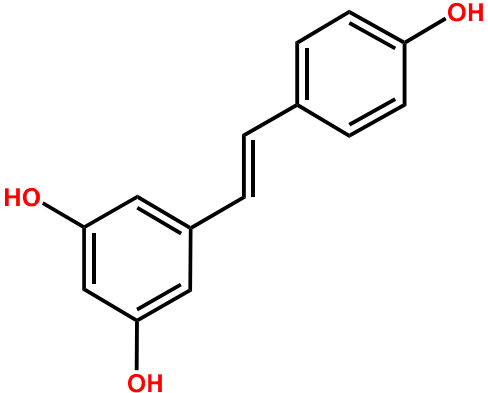  | 0.668  | Trans-resveratrol               | 229.26           | 229.243         | [M+H] <sup>+</sup> | C <sub>14</sub> H <sub>12</sub> O <sub>3</sub> | Stilbene                        | [82]      |
| 3           | 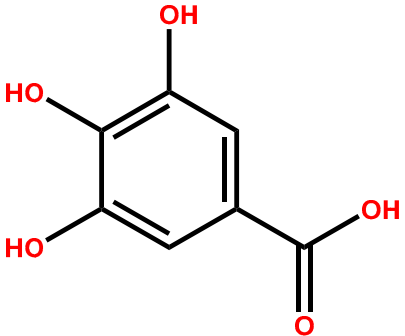 | 0.99   | Gallic acid                     | 171.21           | 171.029         | [M+H] <sup>+</sup> | C <sub>7</sub> H <sub>7</sub> O <sub>5</sub>   | Gallotannins, Phenolic fragment | [83]      |

|   |                                                                                   |       |                 |        |          |           |                      |                       |      |
|---|-----------------------------------------------------------------------------------|-------|-----------------|--------|----------|-----------|----------------------|-----------------------|------|
| 4 | 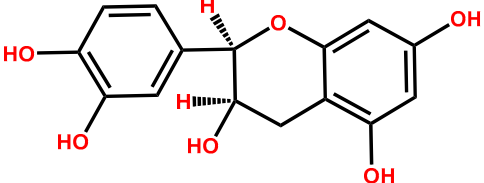 | 1.019 | (-)-Epicatechin | 291.09 | 291.0869 | $[M+H]^+$ | $C_{15}H_{14}O_6$    | Flavonoids, catechins | [84] |
| 5 | 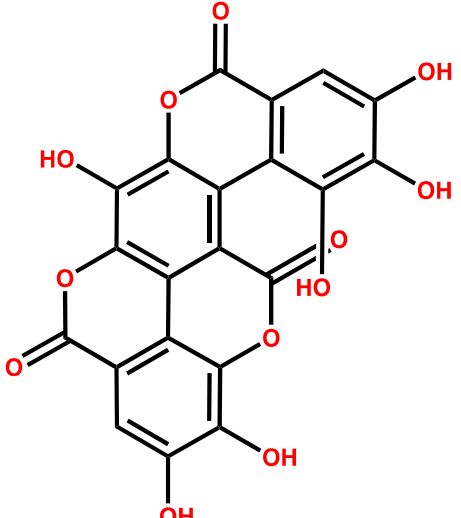 | 3.220 | Flavogallol     | 453.65 | 453.0096 | $[M+H]^+$ | $C_{21}H_{18}O_{12}$ | Hydrolysable Tannin   | [85] |

**Figure S1.** Preliminary fingerprinting: Total Ion Chromatogram, and 3D Chromatogram for Cabernet Sauvignon Malbec wine sample by UPLC-QDa.

A) Cabernet Sauvignon Malbec wine TOTAL ION CHROMATOGRAM: Exploratory mass scan from 50 -1000 Da,  
B) 3D Chromatogram [the x -axis represents time, and y -axis represents signal intensity ]

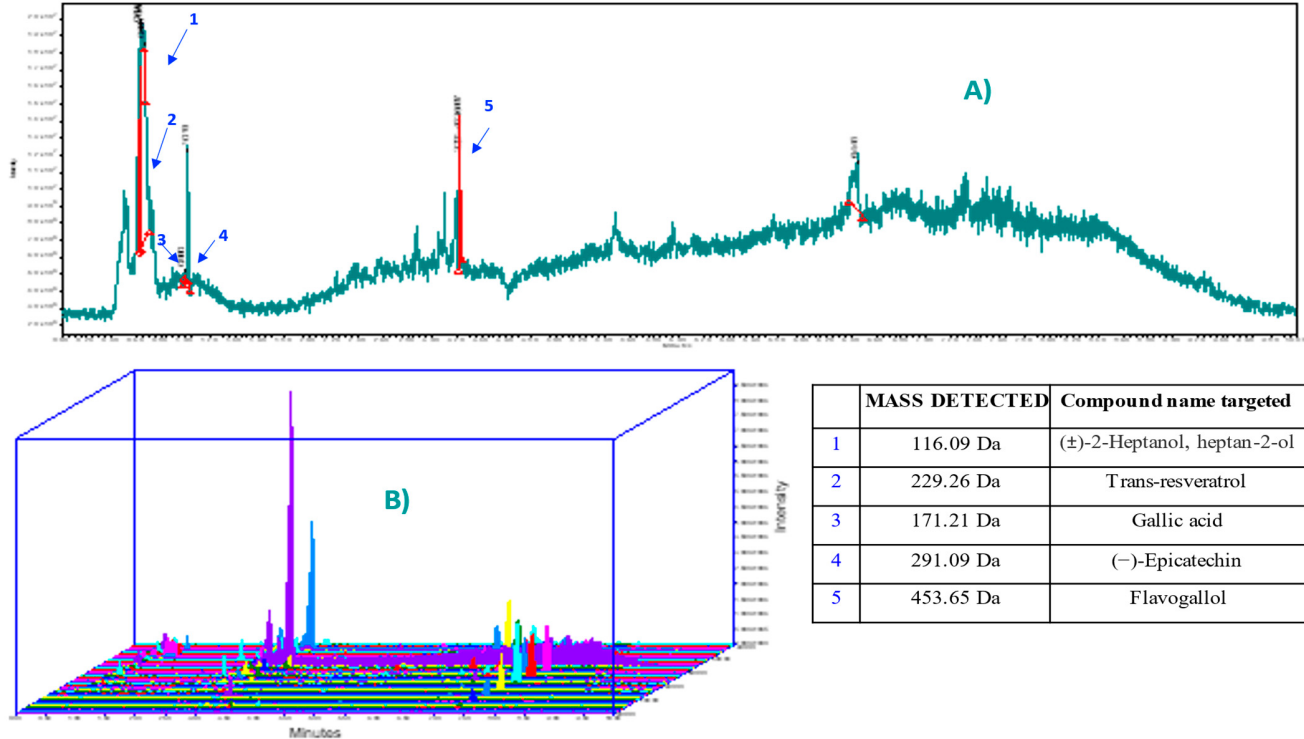

**Figure S2.** Mass spectrum for flavagallol and trans-resveratrol.

Targeted mass analysis for Flavogallol detected at 453.00 m/z, ESI+

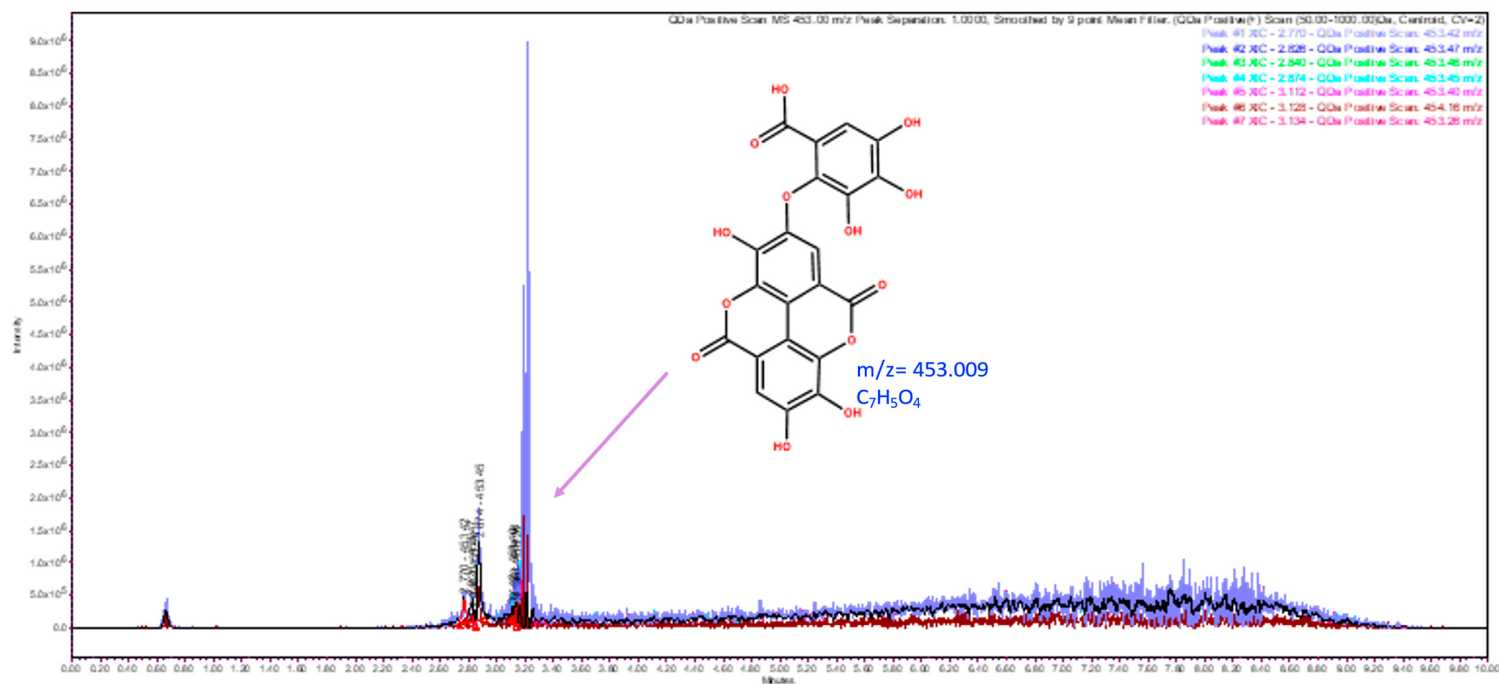

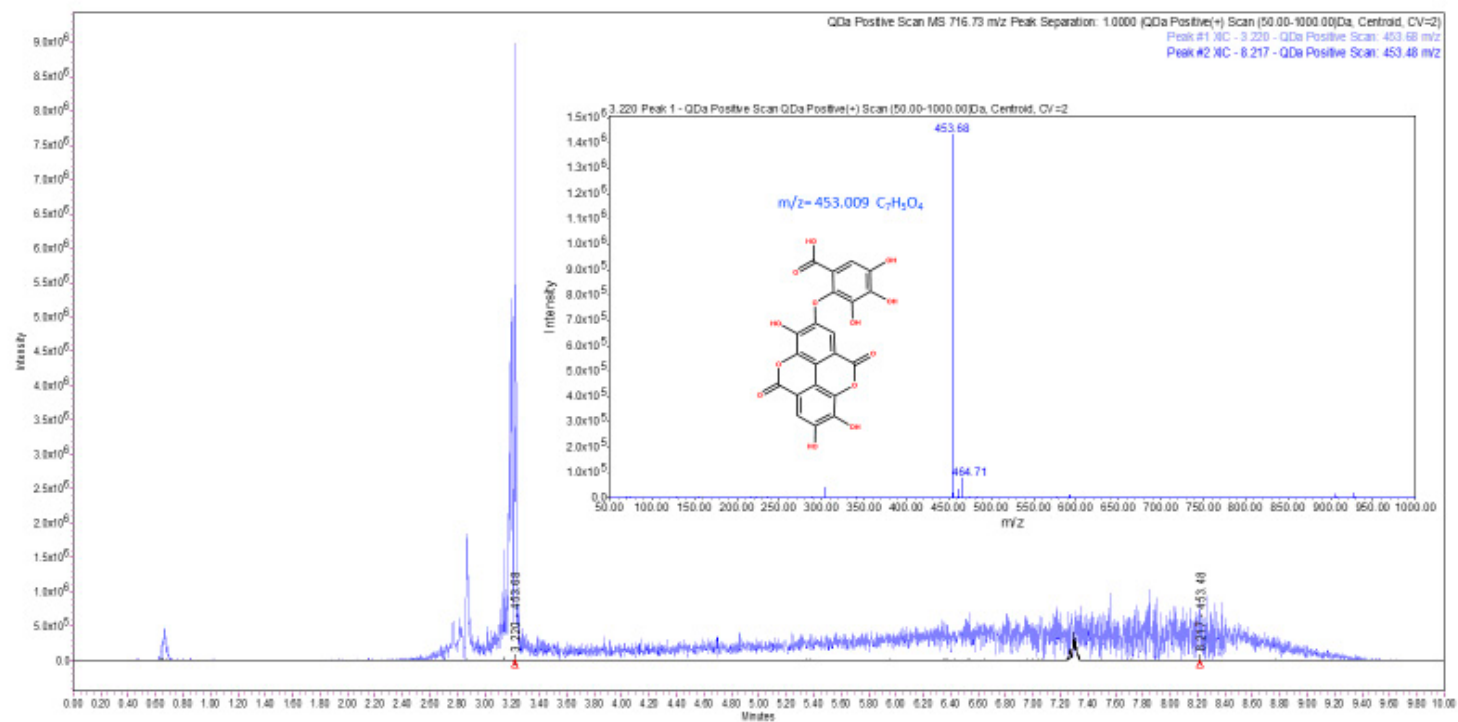

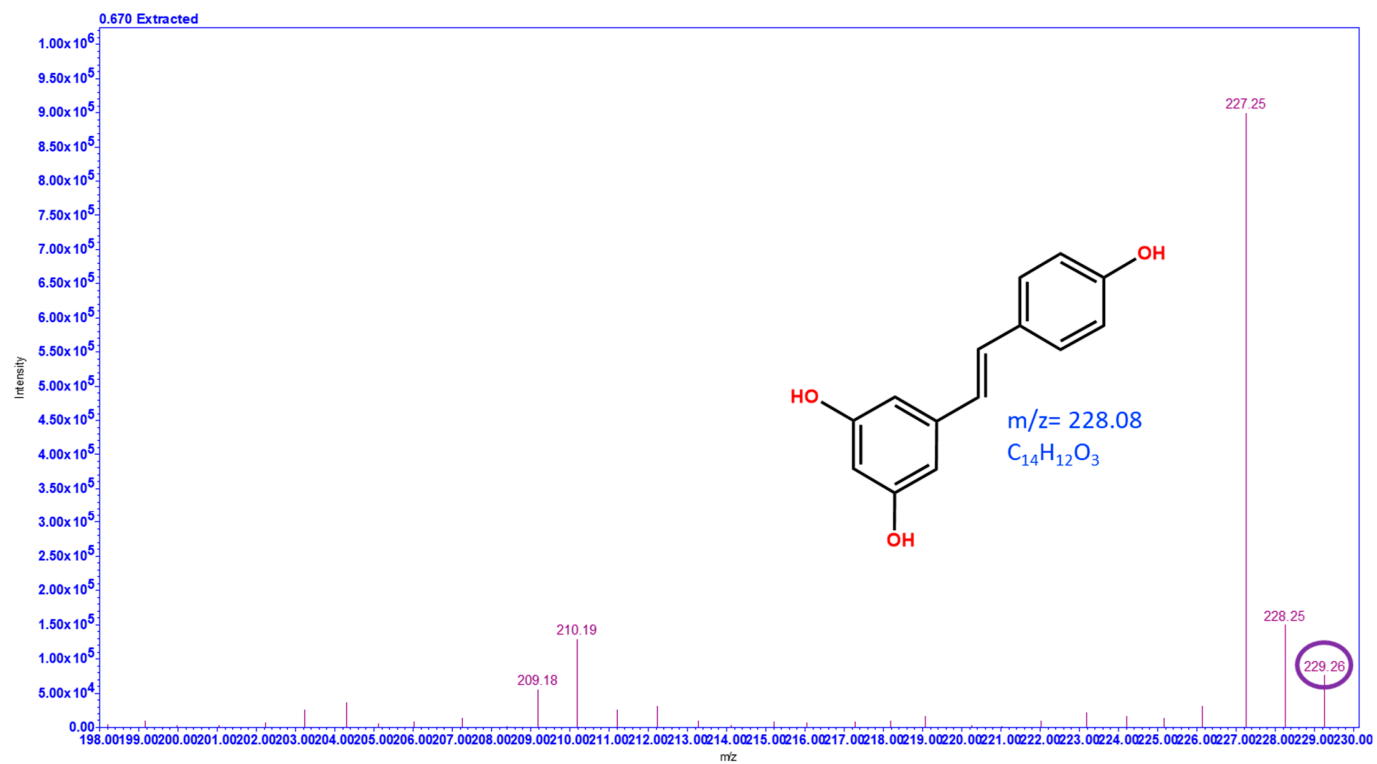

Supplement: s1 [file s1 › applsci-1414896-supplementary.pdf]
